# Supplementary material for: Association between Post-Diagnosis Particulate Matter Exposure among 5-Year Cancer Survivors and Cardiovascular Disease Risk in Three Metropolitan Areas from South Korea
Source: PubMed Central journal article supplement (PMC7215375; doi:10.3390/ijerph17082841), 2020-04-21
Supplement: ijerph-17-02841-s001.pdf [file ijerph-17-02841-s001.pdf]

Supplementary Materials:

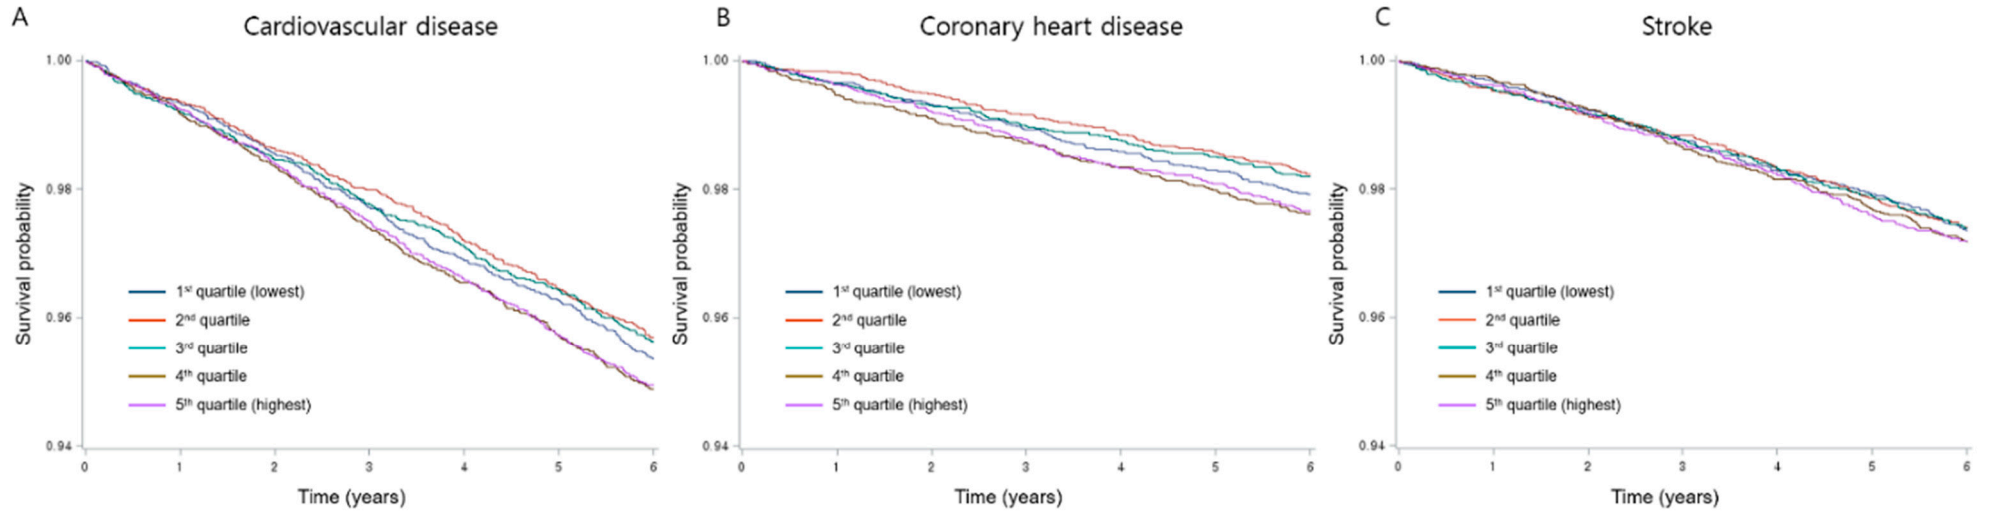

Figure S1. Kaplan–Meier survival analysis of (A) cardiovascular disease, (B) coronary heart disease, and (C) stroke survival according to quintiles of PM2.5 concentration.

**Table S1.** Stratified analysis on the association of post-diagnosis PM2.5 levels among 5-year cancer survivors with cardiovascular disease according to subgroups of sex.

|                        | PM2.5, Quintiles |                  |                  |                  |                  | <i>p</i> for Trend |
|------------------------|------------------|------------------|------------------|------------------|------------------|--------------------|
|                        | 1st (Lowest)     | 2nd              | 3rd              | 4th              | 5th (Highest)    |                    |
| <b>Men</b>             |                  |                  |                  |                  |                  |                    |
| Cardiovascular disease |                  |                  |                  |                  |                  |                    |
| Events                 | 204              | 178              | 182              | 240              | 185              |                    |
| Person-years           | 16,184           | 15,601           | 15,946           | 18,966           | 15,056           |                    |
| aHR (95% CI)           | 1.00 (reference) | 0.96 (0.77–1.19) | 0.97 (0.78–1.20) | 1.01 (0.84–1.22) | 1.11 (0.84–1.46) | 0.528              |
| Coronary heart disease |                  |                  |                  |                  |                  |                    |
| Events                 | 95               | 77               | 84               | 116              | 92               |                    |
| Person-years           | 16,184           | 15,601           | 15,946           | 18,966           | 15,056           |                    |
| aHR (95% CI)           | 1.00 (reference) | 0.96 (0.70–1.33) | 1.03 (0.75–1.41) | 1.08 (0.82–1.41) | 1.33 (0.91–1.96) | 0.189              |
| Stroke                 |                  |                  |                  |                  |                  |                    |
| Events                 | 109              | 101              | 98               | 124              | 93               |                    |
| Person-years           | 16,184           | 15,601           | 15,946           | 18,966           | 15,056           |                    |
| aHR (95% CI)           | 1.00 (reference) | 0.95 (0.71–1.26) | 0.92 (0.69–1.23) | 0.96 (0.74–1.24) | 0.92 (0.62–1.37) | 0.707              |
| <b>Women</b>           |                  |                  |                  |                  |                  |                    |
| Cardiovascular disease |                  |                  |                  |                  |                  |                    |
| Events                 | 155              | 151              | 143              | 199              | 180              |                    |
| Person-years           | 29,133           | 29,336           | 27,681           | 31,098           | 27,151           |                    |
| aHR (95% CI)           | 1.00 (reference) | 1.09 (0.85–1.39) | 1.17 (0.92–1.49) | 1.23 (0.99–1.51) | 1.55 (1.17–2.05) | 0.003              |
| Coronary heart disease |                  |                  |                  |                  |                  |                    |
| Events                 | 63               | 56               | 49               | 86               | 74               |                    |
| Person-years           | 29,133           | 29,336           | 27,681           | 31,098           | 27,151           |                    |
| aHR (95% CI)           | 1.00 (reference) | 1.21 (0.82–1.81) | 1.21 (0.81–1.82) | 1.35 (0.97–1.87) | 1.64 (1.06–2.53) | 0.021              |
| Stroke                 |                  |                  |                  |                  |                  |                    |
| Events                 | 92               | 95               | 94               | 113              | 106              |                    |
| Person-years           | 29,133           | 29,336           | 27,681           | 31,098           | 27,151           |                    |
| aHR (95% CI)           | 1.00 (reference) | 1.01 (0.75–1.38) | 1.14 (0.84–1.54) | 1.14 (0.87–1.51) | 1.49 (1.03–2.15) | 0.048              |

Particulate matter levels determined by 4-year average levels during 2008–2011. Adjusted hazard ratio calculated by Cox proportional hazards regression analysis after adjustments for age, sex, household income, area of residence, Charlson comorbidity index, and cardiotoxic chemotherapy. Acronyms: PM, particulate matter; aHR, adjusted hazard ratio; CI, confidence interval.

**Table S2** Descriptive characteristics of the study population that underwent health screening examinations.

|                                                 | PM2.5, Quintiles |              |              |              |               | <i>p</i> Value |
|-------------------------------------------------|------------------|--------------|--------------|--------------|---------------|----------------|
|                                                 | 1st (Lowest)     | 2nd          | 3rd          | 4th          | 5th (Highest) |                |
| Smoking, <i>N</i> (%)                           |                  |              |              |              |               |                |
| Never smoker                                    | 2923 (74.6)      | 2825 (74.6)  | 2553 (75.5)  | 3094 (72.7)  | 2574 (72.1)   | 0.001          |
| Past smoker                                     | 710 (18.1)       | 666 (17.6)   | 621 (18.4)   | 813 (19.1)   | 685 (19.2)    |                |
| Current smoker                                  | 285 (7.3)        | 296 (7.8)    | 209 (6.2)    | 352 (8.3)    | 312 (8.7)     |                |
| Alcohol intake, times per week, <i>N</i> (%)    |                  |              |              |              |               |                |
| 0                                               | 2906 (74.2)      | 2735 (72.2)  | 2468 (73.0)  | 3061 (71.9)  | 2623 (73.5)   | 0.067          |
| 0–1                                             | 481 (12.3)       | 484 (12.8)   | 421 (12.4)   | 537 (12.6)   | 455 (12.7)    |                |
| 1–2                                             | 228 (5.8)        | 216 (5.7)    | 205 (6.1)    | 306 (7.2)    | 208 (5.8)     |                |
| 3–4                                             | 199 (5.1)        | 228 (6.0)    | 184 (5.4)    | 204 (4.8)    | 175 (4.9)     |                |
| ≥5                                              | 104 (2.7)        | 124 (3.3)    | 105 (3.1)    | 151 (3.6)    | 110 (3.1)     |                |
| Physical activity, times per week, <i>N</i> (%) |                  |              |              |              |               |                |
| 0                                               | 1785 (45.6)      | 1675 (44.2)  | 1483 (43.8)  | 1872 (44.0)  | 1693 (47.4)   | 0.035          |
| 1–2                                             | 605 (15.4)       | 637 (16.8)   | 553 (16.4)   | 696 (16.3)   | 543 (15.2)    |                |
| 3–4                                             | 580 (14.8)       | 536 (14.2)   | 520 (15.4)   | 618 (14.5)   | 501 (14.0)    |                |
| 5–6                                             | 414 (10.6)       | 420 (11.1)   | 416 (12.3)   | 484 (11.4)   | 366 (10.3)    |                |
| 7                                               | 534 (13.6)       | 519 (13.7)   | 411 (12.2)   | 589 (13.8)   | 468 (13.1)    |                |
| Body mass index, kg/m <sup>2</sup> , mean (SD)  | 23.4 (3.1)       | 23.5 (3.1)   | 23.4 (3.1)   | 23.4 (3.1)   | 23.5 (3.2)    | 0.097          |
| Systolic blood pressure, mmHg, mean (SD)        | 121.5 (15.4)     | 123.8 (15.3) | 122.3 (15.5) | 122.9 (15.4) | 123.3 (16.1)  | <0.001         |
| Fasting serum glucose, mg/dL, mean (SD)         | 99.5 (21.0)      | 99.7 (21.1)  | 98.8 (21.2)  | 99.6 (22.6)  | 100.1 (23.3)  | 0.221          |
| Total cholesterol, mg/dL, mean (SD)             | 193.9 (36.2)     | 193.2 (43.6) | 193.4 (36.9) | 193.2 (37.0) | 192.9 (36.3)  | 0.848          |

Particulate matter levels determined by 4-year average levels during 2008–2011. *p*-value calculated by Chi-squared test for categorical variables and analysis of variance for continuous variables. Acronyms: PM, particulate matter; SD, standard deviation; N, number of participants.

**Table S3.** Hazard ratios for cardiovascular disease according to post-diagnosis PM2.5 levels among 5-year cancer survivors who underwent health screening examinations.

|                        | PM2.5, Quintiles |                  |                  |                  |                  | <i>p</i> for Trend |
|------------------------|------------------|------------------|------------------|------------------|------------------|--------------------|
|                        | 1st (Lowest)     | 2nd              | 3rd              | 4th              | 5th (Highest)    |                    |
| Cardiovascular disease |                  |                  |                  |                  |                  |                    |
| Events                 | 155              | 139              | 142              | 195              | 171              |                    |
| Person-years           | 22,307           | 21,614           | 19,233           | 23,992           | 20,118           |                    |
| aHR (95% CI)           | 1.00 (reference) | 1.03 (0.80–1.32) | 1.20 (0.94–1.54) | 1.13 (0.91–1.40) | 1.37 (1.03–1.83) | 0.037              |
| Coronary heart disease |                  |                  |                  |                  |                  |                    |
| Events                 | 81               | 69               | 58               | 101              | 78               |                    |
| Person-years           | 22,307           | 21,614           | 19,233           | 23,992           | 20,118           |                    |
| aHR (95% CI)           | 1.00 (reference) | 1.08 (0.76–1.54) | 1.03 (0.71–1.48) | 1.14 (0.85–1.53) | 1.28 (0.85–1.94) | 0.245              |
| Stroke                 |                  |                  |                  |                  |                  |                    |
| Events                 | 74               | 70               | 84               | 94               | 93               |                    |
| Person-years           | 22,307           | 21,614           | 19,233           | 23,992           | 20,118           |                    |
| aHR (95% CI)           | 1.00 (reference) | 0.98 (0.69–1.39) | 1.37 (0.98–1.92) | 1.12 (0.83–1.52) | 1.47 (0.98–2.20) | 0.071              |

Particulate matter levels determined by 4-year average levels during 2008–2011. Adjusted hazard ratio calculated by Cox proportional hazards regression analysis after adjustments for age, sex, household income, area of residence, Charlson comorbidity index, cardiotoxic chemotherapy, smoking, alcohol intake, physical activity, body mass index, systolic blood pressure, fasting serum glucose, and total cholesterol. Acronyms: PM, particulate matter; aHR, adjusted hazard ratio; CI, confidence interval.
